# Supplementary material for: Two HEPN domains dictate CRISPR RNA maturation and target cleavage in Cas13d
Source: PubMed Central journal article supplement (PMC6559982; doi:10.1038/s41467-019-10507-3), 2019-06-11
Supplement: 41467_2019_10507_MOESM1_ESM.pdf [file 41467_2019_10507_MOESM1_ESM.pdf]

1  
2  
3  
4  
5

**SUPPLEMENTARY INFORMATION**

**Two HEPN domains dictate CRISPR RNA maturation and target cleavage in Cas13d**

B. Zhang, Y. Ye et al.

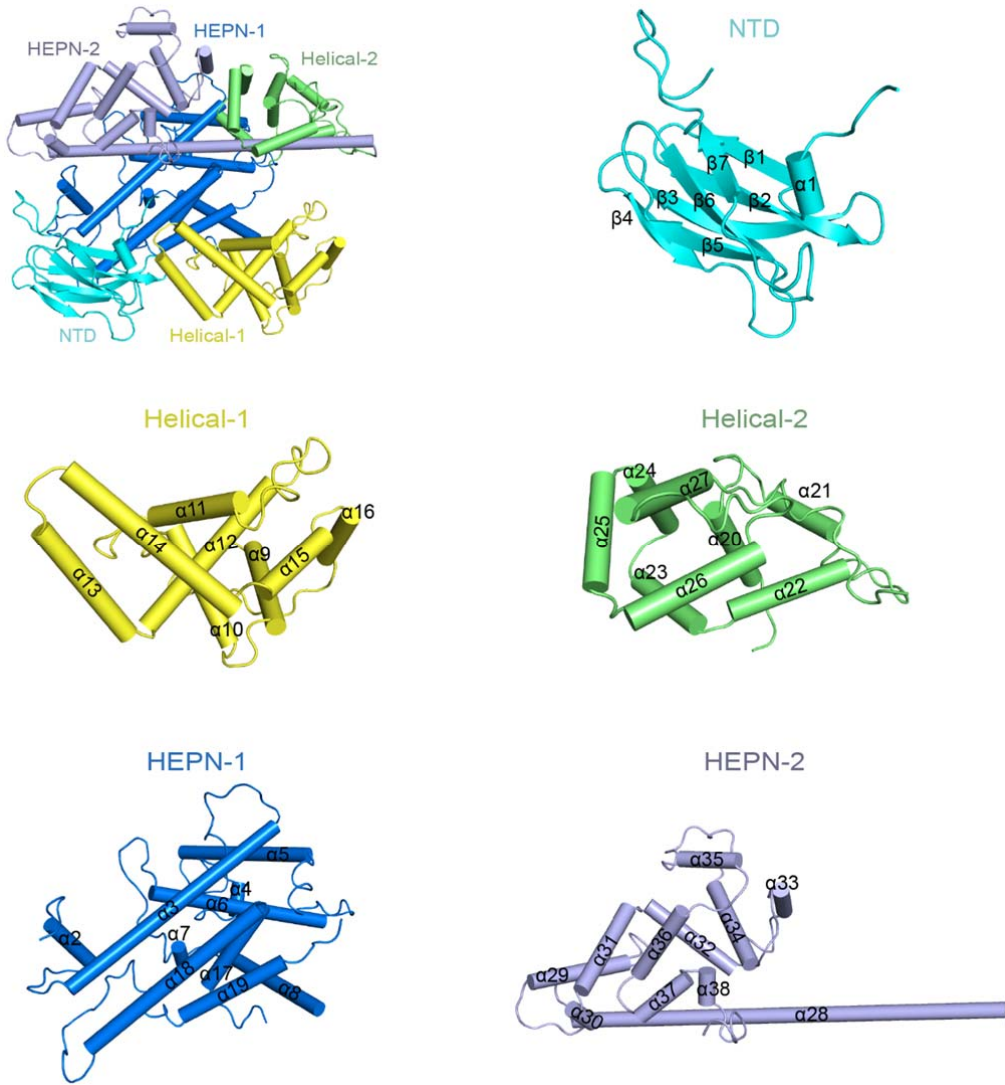

6  
 7 **Supplementary Fig. 1 | Structures of individual domains of UrCas13d in the**  
 8 **UrCas13d-crRNA binary complex.**

9 Domains are colored according to Fig. 1.

10

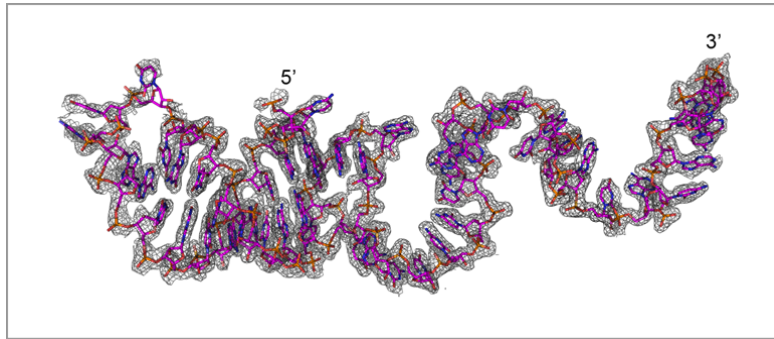

11 **Supplementary Fig. 2 | Electron density maps of crRNAs in the UrCas13d binary**  
12 **complexes.**

13 The electron density map of crRNA in the UrCas13d-crRNA binary complex. A 50-nt crRNA  
14 was determined in the binary complex. The 2Fo-Fc omit map was contoured at 1.0  $\sigma$  level.

15

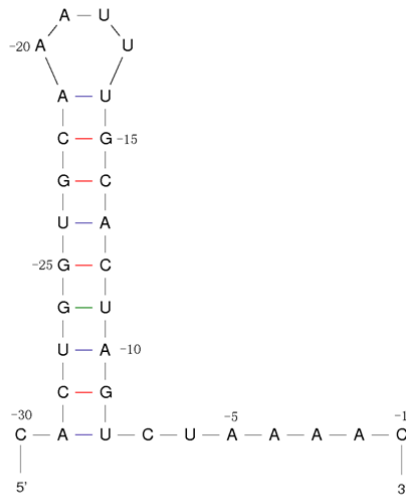

16 **Supplementary Fig. 3 | Predicted secondary structure of the mature crRNA repeat**  
 17 **region in the UrCas13d-crRNA binary complex.**

18 Result predicted by the mfold web server (<http://unafold.rna.albany.edu/?q=mfold>).

19

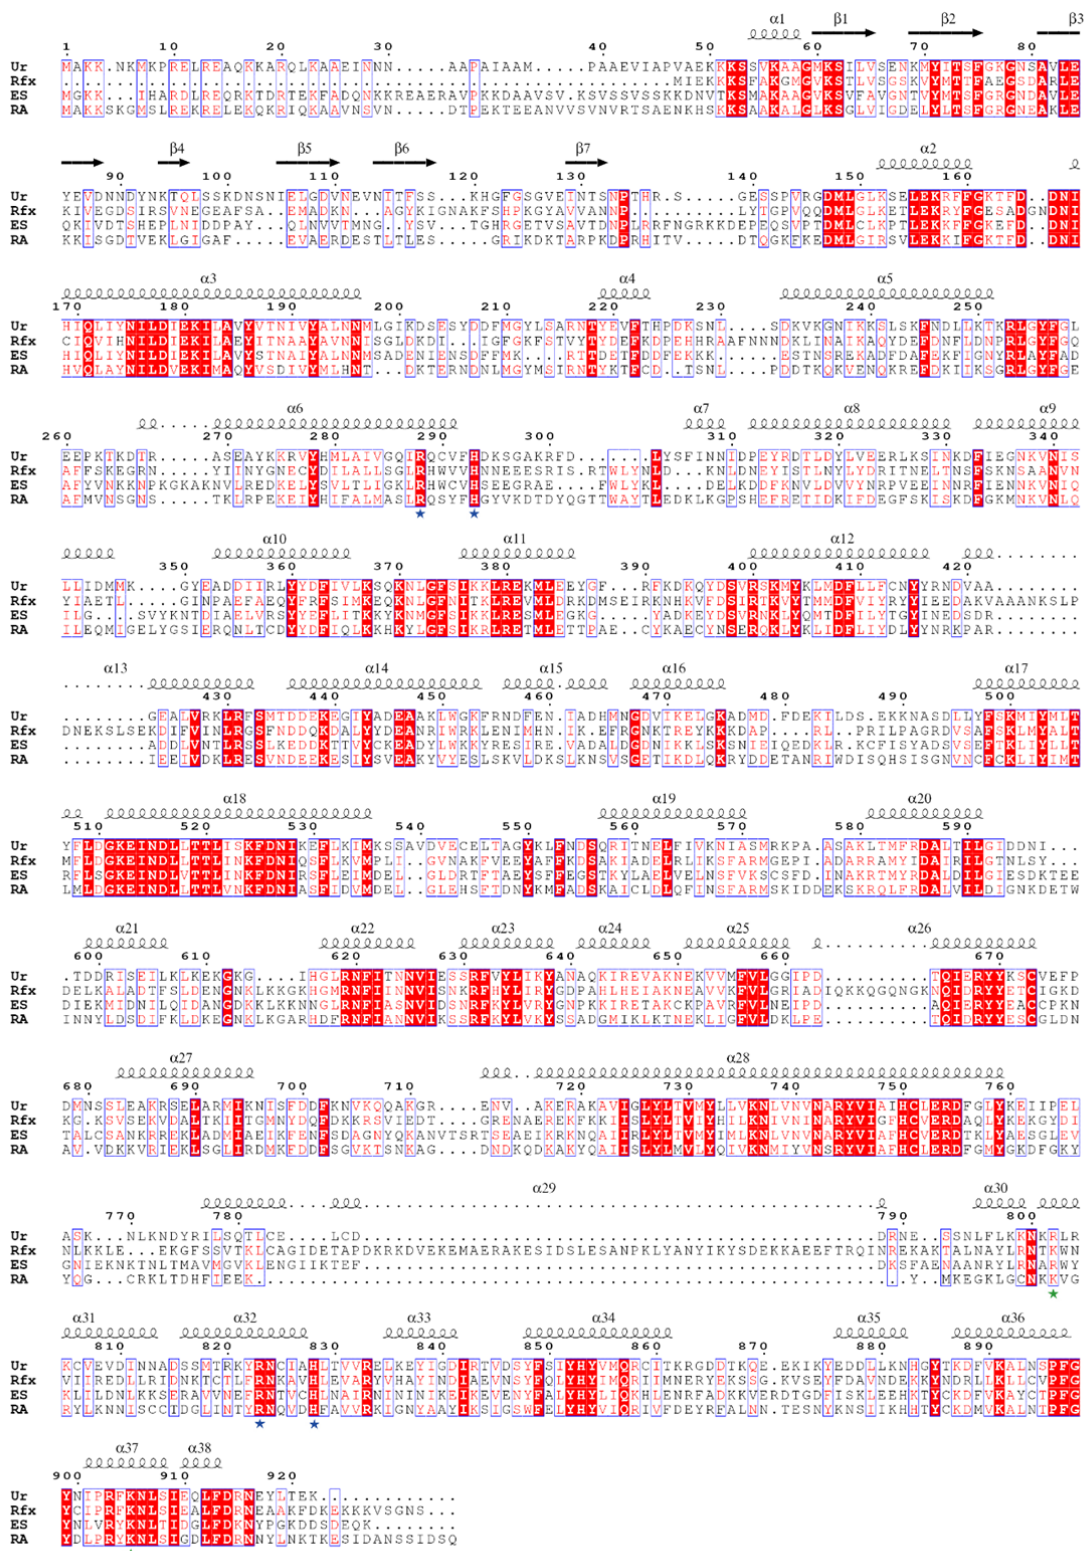

21 **Supplementary Fig. 4 | Multiple sequence alignment of Cas13d proteins from different**  
22 **species.**

23 Sequence alignment of UrCas13d (Uncultured *Ruminococcus sp.* Cas13d), RfxCas13d  
24 (*Ruminococcus flavefaciens* XPD3002 Cas13d), EsCas13d (*Eubacterium siraeum* Cas13d)  
25 and RaCas13d (*Ruminococcus albus* Cas13d) was generated using Clustal Omega and the  
26 figure was prepared using ESPript (<http://esript.ibcp.fr>). The secondary structure of  
27 UrCas13d is shown above the sequence. Identical and similar residues are highlighted in red  
28 and white boxes, respectively. Critical residues involved in the pre-crRNA cleavage are  
29 marked with green stars, and catalytic residues involved in the target RNA cleavage are  
30 marked with blue stars.

31

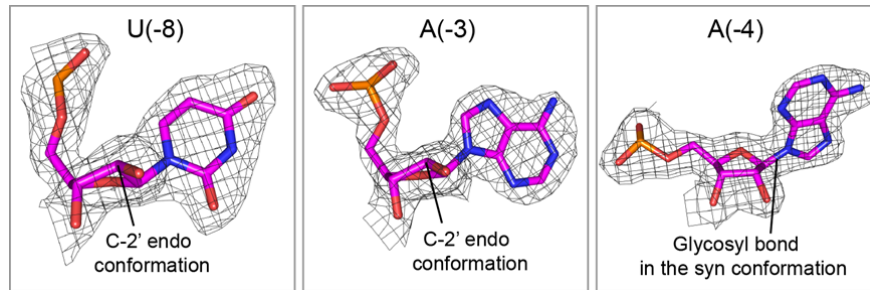

32 **Supplementary Fig. 5 | Conformations of nucleotides U(-8), A(-3) and A(-4) within the**  
 33 **U-shaped turn of the crRNA repeat region.**  
 34 Compared to a standard A-form RNA, nucleotides U(-8), A(-4) and A(-3) within the  
 35 U-shaped turn have unusual conformations with respect to their sugar pucker or glycosyl  
 36 bond. The 2Fo-Fc omit map was contoured at 1.0  $\sigma$  level.  
 37

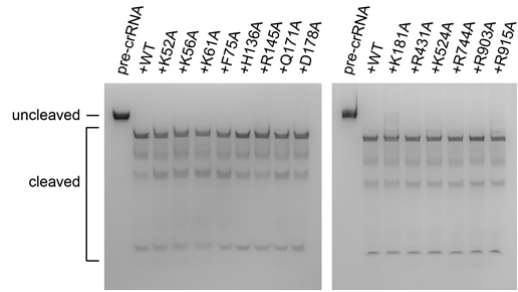

38 **Supplementary Fig. 6 | Pre-crRNA processing by wild-type UrCas13d and its mutants.**

39 Denaturing gel demonstrating the cleavage of pre-crRNA by wild-type UrCas13d and its  
40 mutants.

41



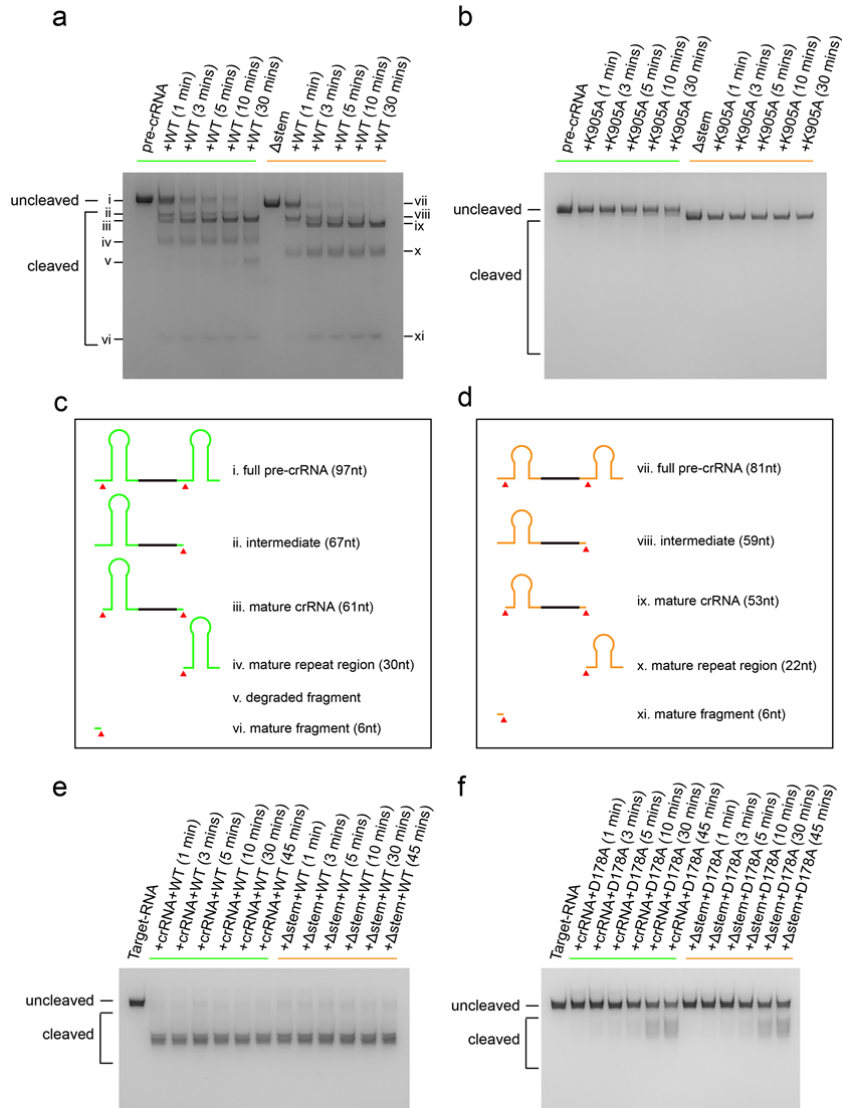

42 **Supplementary Fig. 7 | The time-course cleavage of pre-crRNA and target RNA by**  
 43 **UrCas13d and its mutants.**

44 **a-b**, denaturing gel demonstrating the time-course cleavage of pre-crRNA or the  $\Delta$ stem  
 45 mutant by the wild-type UrCas13d or the K905A mutant; **c-d**, the expected sizes of the  
 46 pre-crRNA cleavage products were labeled as i-vi, and the expected sizes of the  $\Delta$ stem  
 47 mutant cleavage products were labeled as vii-xi; **e-f**, denaturing gel demonstrating the  
 48 time-course cleavage of target RNA by the wild-type UrCas13d or the D178A mutant in the  
 49 presence of crRNA or the  $\Delta$ stem mutant. The rationale behind selecting these mutants in the

50 experiments is that the K905A mutant abolishes the pre-crRNA processing, while the D178A  
51 mutant greatly decreases the target RNA cleavage.

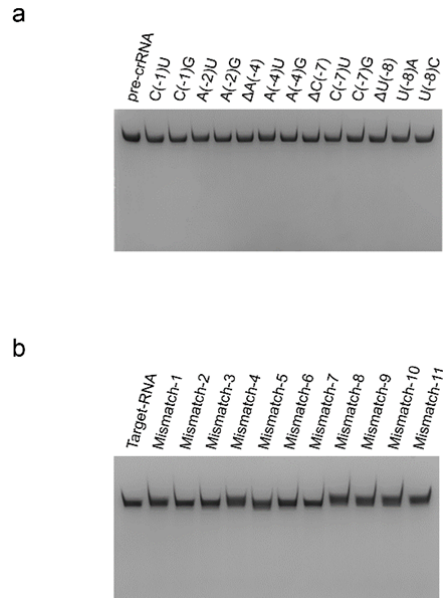

52

53 **Supplementary Fig. 8 | Pre-crRNA, target RNA and their mutants.**

54 **a**, Denaturing gel demonstrating pre-crRNA and its mutants. **b**, Denaturing gel demonstrating

55 target RNA and the mismatched mutants.

56

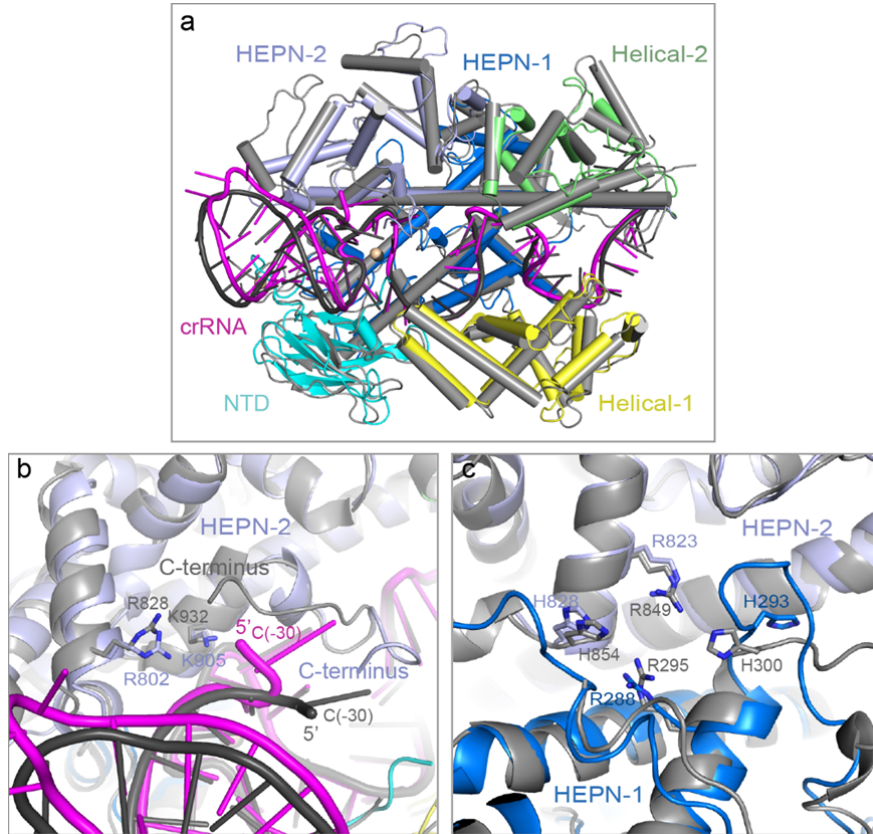

57

58 **Supplementary Fig. 9 | Comparison of the UrCas13d and EsCas13d binary complexes.**

59 **a**, Superimposition of the UrCas13d binary complex (PDB code: 6IV9) and the EsCas13d  
 60 binary complex (PDB code: 6E9E). Domains and crRNA of the UrCas13d binary complex  
 61 are colored and labeled according to Fig. 1. Domains and crRNA of the EsCas13d complex  
 62 are colored in gray and black, respectively. **b**, Comparison of the pre-crRNA processing sites  
 63 in two binary complexes. Two critical residues from HEPN-2 domain of the respective binary  
 64 complexes are colored and labeled according to **(a)**. **c**, Comparison of the target  
 65 RNA-cleavage sites in two binary complexes. Four catalytic residues from HEPN-1 and  
 66 HEPN-2 domains of the respective binary complexes are colored and labeled according to  
 67 **(a)**.

68

69 **Supplementary Table 1 | X-ray crystallography data collection and refinement statistics.**

| <b>Dataset</b>                                          | SeMet-UrCas13d-R288A/R823A-crRNA                      | UrCas13d-R288A/R823A-crRNA                            |
|---------------------------------------------------------|-------------------------------------------------------|-------------------------------------------------------|
| <b>Data collection</b>                                  |                                                       |                                                       |
| Beamline                                                | BL-17U1, SSRF                                         | BL-17U1, SSRF                                         |
| Wavelength (Å)                                          | 0.9792                                                | 0.9792                                                |
| Space group                                             | <i>P</i> 2 <sub>1</sub> 2 <sub>1</sub> 2 <sub>1</sub> | <i>P</i> 2 <sub>1</sub> 2 <sub>1</sub> 2 <sub>1</sub> |
| Cell dimensions                                         |                                                       |                                                       |
| <i>a, b, c</i> (Å)                                      | 65.16, 145.73, 249.38                                 | 72.22, 136.48, 147.28                                 |
| <i>α, β, γ</i> (°)                                      | 90.0, 90.0, 90.0                                      | 90.0, 90.0, 90.0                                      |
| Resolution range (Å)*                                   | 62.91-2.15 (2.19-2.15)                                | 100.11-1.86 (1.89-1.86)                               |
| Completeness (%)                                        | 99.70 (100.0)                                         | 98.90 (98.80)                                         |
| <i>I</i> / <i>σ</i> ( <i>I</i> )                        | 18.1 (6.3)                                            | 21.0 (3.6)                                            |
| <i>R</i> <sub>merge</sub>                               | 0.129 (0.842)                                         | 0.071 (0.882)                                         |
| Multiplicity                                            | 13.3 (13.9)                                           | 13.5 (14.1)                                           |
| <b>Refinement</b>                                       |                                                       |                                                       |
| Resolution (Å)                                          | 2.15                                                  | 1.86                                                  |
| No. unique reflections                                  | 129,626                                               | 121,127                                               |
| <i>R</i> <sub>work</sub> / <i>R</i> <sub>free</sub> (%) | 18.9/ 21.0                                            | 17.0/ 19.6                                            |
| No. atoms                                               |                                                       |                                                       |
| Protein                                                 | 14,076                                                | 7,126                                                 |
| Nucleic acid                                            | 2,196                                                 | 1,054                                                 |
| Solvent                                                 | 665                                                   | 475                                                   |
| Mg <sup>2+</sup>                                        | 2                                                     | 2                                                     |
| <i>B</i> -factors (Å <sup>2</sup> )                     |                                                       |                                                       |
| Protein                                                 | 48.36                                                 | 38.91                                                 |
| Nucleic acid                                            | 60.94                                                 | 42.76                                                 |
| Solvent                                                 | 37.16                                                 | 40.55                                                 |
| Mg <sup>2+</sup>                                        | 26.88                                                 | 44.18                                                 |
| R.m.s deviations                                        |                                                       |                                                       |
| Bond length (Å)                                         | 0.013                                                 | 0.015                                                 |
| Bond angles (°)                                         | 1.78                                                  | 1.74                                                  |
| Ramachandran plot (%)                                   |                                                       |                                                       |
| Favored region                                          | 98.37                                                 | 98.39                                                 |
| Allowed region                                          | 1.63                                                  | 1.61                                                  |
| Outliers region                                         | 0                                                     | 0                                                     |

70 \*Highest resolution shell is shown in parentheses.

71

72 **Supplementary Table 2 | DNA coding sequence of UrCas13d used in this study.**

| Description | DNA coding sequence*                                                                                                                                                                                                                                                                                                                                                                                                                                                                                                                                                                                                                                                                                                                                                                                                                                                                                                                                                                                                                                                                                                                                                                                                                                                                                                                                                                                                                                                                                                                                                                                                                                                                                                                                                                                                                                                                                                                                                                                                                                                                                                                                                                                                                                                                                                                                                                                                                                                                                                                                  |
|-------------|-------------------------------------------------------------------------------------------------------------------------------------------------------------------------------------------------------------------------------------------------------------------------------------------------------------------------------------------------------------------------------------------------------------------------------------------------------------------------------------------------------------------------------------------------------------------------------------------------------------------------------------------------------------------------------------------------------------------------------------------------------------------------------------------------------------------------------------------------------------------------------------------------------------------------------------------------------------------------------------------------------------------------------------------------------------------------------------------------------------------------------------------------------------------------------------------------------------------------------------------------------------------------------------------------------------------------------------------------------------------------------------------------------------------------------------------------------------------------------------------------------------------------------------------------------------------------------------------------------------------------------------------------------------------------------------------------------------------------------------------------------------------------------------------------------------------------------------------------------------------------------------------------------------------------------------------------------------------------------------------------------------------------------------------------------------------------------------------------------------------------------------------------------------------------------------------------------------------------------------------------------------------------------------------------------------------------------------------------------------------------------------------------------------------------------------------------------------------------------------------------------------------------------------------------------|
| UrCas13d    | ATGGCAAAAAAAAAATAAAATGAAACCGCGTGAAGTGCCTGAAAGCACAGAAAAAAGC<br>ACGTCAGCTGAAAGCAGCAGAAATTAATAATAATGCAGCACCGGCAATTGCAGCAAT<br>GCCGGCAGCAGAAGTTATTGCACCGGTTGCAGAAAAAAAAAAAAAGCAGCGTTAAAGC<br>AGCAGGTATGAAAAGCATTCTGGTTAGCGAAAATAAAATGTATATTACCAGCTTTGGT<br>AAAGGTAATAGCGCAGTCTGGAATATGAAGTTGATAATAATGATTATAATAAAACC<br>CAGCTGAGCAGCAAAGATAATAGCAATATTGAACTGGGTGATGTTAATGAAGTTAAT<br>ATTACCTTTAGCAGCAAACATGGTTTTGGTAGCGGTGTTGAAATTAATACCAGCAATC<br>CGACCCATCGTAGCGGTGAAAGCAGCCCGTTCTGGTGATATGCTGGGTCTGAAAA<br>GCGAACTGGAAAAACGTTTTTTGGTAAAACCTTTGATGATAATATTCATATTCAGCT<br>GATTTATAATATTCTGGATATTGAAAAAATCTGGCAGTTTATGTTACCAATATTGTTT<br>ATGCACTGAATAATATGCTGGGTATTAAGATAGCGAAAGCTATGATGATTTTATGGG<br>TTATCTGAGCGCACGTAATACCTATGAAGTTTTTACCCATCCGGATAAAAAGCAATCTG<br>AGCGATAAAGTTAAAGTAATATTAAGAAAGCCTGAGCAAATTAATGATCTGCTG<br>AAAACCAAACGCTCTGGTTATTTTGGTCTGGAAGAACCGAAAACCAAGATACCCGT<br>GCAAGCGAAGCATATAAAAAACGTGTTTATCACATGCTGGCAATTGTTGGTCAGATTC<br>GTCAGTGTGTTTTTCATGATAAAAAGCGGTGCAAAACGTTTTGATCTGTATAGCTTTATT<br>AATAATATTGATCCGGAATATCGTGATACCCTGGATTATCTGGTTGAAGAACGCTGA<br>AAAGCATTATAAAGATTTTATTGAAGTAATAAAGTTAATATTAGCCTGCTGATTGA<br>TATGATGAAAGTTATGAAGCAGATGATATTATTCGCTGTATTATGATTTTATTGTTT<br>TGAAAAGCCAGAAAAATCTGGGTTTTAGCATTAAAAAACTGCGTGAAAAAATGCTGG<br>AAGAATATGGTTTTTCGTTTTAAAGATAAACAGTATGATAGCGTTCGTAGCAAAATGTA<br>TAAACTGATGGATTTTCTGCTGTTTTGTAATTATTATCGTAATGATGTTGCAGCAGGTG<br>AAGCACTGGTTCGTAAACTGCGTTTTAGCATGACCGATGATGAAAAAGAAGGTATTTA<br>TGCAGATGAAGCAGCAAACCTGTGGGGTAAATTTTCGTAATGATTTTGAAAAATATTGCA<br>GATCACATGAATGGTGATGTTATTAAGAAGTGGTAAAGCAGATATGGATTTTGATG<br>AAAAAATCTGGATAGCGAAAAAAAAAATGCAAGCGATCTGCTGTATTTTAGCAAAA<br>TGATTTATATGCTGACCTATTTTCTGGATGGTAAAGAAATTAATGATCTGCTGACCACC<br>CTGATTAGCAAAATTTGATAATATTAAGAATTTCTGAAAATTATGAAAAGCAGCGCAG<br>TTGATGTTGAATGTGAACTGACCGCAGGTTATAAACTGTTAATGATAGCCAGCGTAT<br>TACCAATGAACTGTTTATTGTTAAAAATATTGCAAGCATGCGTAAACCGGCAGCAAGC<br>GCAAACTGACCATGTTTCTGATGCACTGACCATTTCTGGGTATTGATGATAATATTA<br>CCGATGATCGTATTAGCGAAATTTCTGAACTGAAAGAAAAAGGTAAAGGTATTCATG<br>GTCTGCGTAATTTTATTACCAATAATGTTATTGAAAGCAGCCGTTTTGTTTATCTGATT<br>AAATATGCAAATGCACAGAAAATTCGTGAAGTTGCAAAAAATGAAAAAGTTGTTATG<br>TTTGTTCTGGGTGGTATCCCGATACCCAGATTGAACGTTATTATAAAAGCTGTGTTGA<br>ATTTCCGGATATGAATAGCAGCCTGGAAGCAAACGTAGCGAACTGGCACGTATGAT<br>TAAAAATATTAGCTTTGATGATTTAAAAATGTTAAACAGCAGGCAAAGGTCTGTGAA<br>AATGTTGCAAAAGAACGTGCAAAAGCAGTTATTGGTCTGTATCTGACCGTTATGTATC<br>TGCTGGTTAAAAATCTGGTTAATGTTAATGCACGTTATGTTATTGCAATTCATTGTCTG<br>GAACGTGATTTGGTCTGTATAAAGAAATTTCCGGAAGTGGCAAGCAAAAAATCTGA |

---

AAAATGATTATCGTATTCTGAGCCAGACCCTGTGTGAACTGTGTGATGATCGTAATGA  
AAGCAGCAATCTGTTTCTGAAAAAAAAATAAACGTCTGCGTAAATGTGTTGAAGTTGAT  
ATTAATAATGCAGATAGCAGCATGACCCGTAATATCGTAATTGTATTGCACATCTGA  
CCGTTGTTTCGTGAACTGAAAGAATATATTGGTGATATTCGTACCGTTGATAGCTATTTT  
AGCATTATCATTATGTTATGCAGCGTTGTATTACCAAACGTGGTGATGATACCAAAC  
AGGAAGAAAAAATTAATATGAAGATGATCTGCTGAAAAATCATGGTTATACCAAAG  
ATTTTGTTAAAGCACTGAATAGCCCGTTTGGTTATAATATTCGCGTTTTAAAAATCTG  
AGCATTGAACAGCTGTTTGATCGTAATGAATATCTGACCGAAAAATAA

---

73

\*Codons have been optimized.

74

75 **Supplementary Table 3 | RNA coding sequences used in the study.**

| <b>Description</b>          | <b>RNA coding sequences*</b>                                                                                                                                                                                                                                                                                                                                                                                                                                                                                           |
|-----------------------------|------------------------------------------------------------------------------------------------------------------------------------------------------------------------------------------------------------------------------------------------------------------------------------------------------------------------------------------------------------------------------------------------------------------------------------------------------------------------------------------------------------------------|
| CRISPR RNA                  | CTACTACACTGGTGCAAATTTGCACTAGTCTAAAACCTCTCGATT<br>ACATACACAAAGCAGCCTACTACACTGGTGCAAATTTGCACTAG<br>TCTAAAACCTCTCGATTACATACACAAAGCAGCCTACTACACTG<br>GTGCAAATTTGCACTAGTCTAAAACCTCTCGATTACATACACAA<br>AGCAGCCTACTACACTGGTGCAAATTTGCACTAGTCTAAAACCTC<br>CTCGATTACATACACAAAGCAGCCTACTACACTGGTGCAAATTT<br>GCACTAGTCTAAAACCTCTCGATTACATACACAAAGCAGCCTAC<br>TACTGGTGCAAATTTGCACTAGTCTAAAACCTCTCGATTACA<br>TACACAAAGCAGCCTACTACACTGGTGCAAATTTGCACTAGTCT<br>AAAACCTCTCGATTACATACACAAAGCAGCCTACTACACTGGTG<br>CAAATTTGCACTAGTCTAAAAC |
| Pre-crRNA                   | CTACTACACTGGTGCAAATTTGCACTAGTCTAAAACCTCTCGATT<br>ACATACACAAAGCAGCCTACTACACTGGTGCAAATTTGCACTAG<br>TCTAAAAC                                                                                                                                                                                                                                                                                                                                                                                                              |
| The ΔU(-8) pre-crRNA mutant | CTACTACACTGGTGCAAATTTGCACTAGCTAAAACCTCTCGATT<br>ACATACACAAAGCAGCCTACTACACTGGTGCAAATTTGCACTAG<br>CTAAAAC                                                                                                                                                                                                                                                                                                                                                                                                                |
| The U(-8)A pre-crRNA mutant | CTACTACACTGGTGCAAATTTGCACTAGACTAAAACCTCTCGAT<br>TACATACACAAAGCAGCCTACTACACTGGTGCAAATTTGCACTA<br>GACTAAAAC                                                                                                                                                                                                                                                                                                                                                                                                              |
| The U(-8)C pre-crRNA mutant | CTACTACACTGGTGCAAATTTGCACTAGCCTAAAACCTCTCGAT<br>TACATACACAAAGCAGCCTACTACACTGGTGCAAATTTGCACTA<br>GCTAAAAC                                                                                                                                                                                                                                                                                                                                                                                                               |
| The ΔC(-7) pre-crRNA mutant | CTACTACACTGGTGCAAATTTGCACTAGTTAAAACCTCTCGATT<br>ACATACACAAAGCAGCCTACTACACTGGTGCAAATTTGCACTAG<br>TTAAAAC                                                                                                                                                                                                                                                                                                                                                                                                                |
| The C(-7)U pre-crRNA mutant | CTACTACACTGGTGCAAATTTGCACTAGTTTAAAACCTCTCGATT<br>ACATACACAAAGCAGCCTACTACACTGGTGCAAATTTGCACTAG<br>TTAAAAC                                                                                                                                                                                                                                                                                                                                                                                                               |
| The C(-7)G pre-crRNA mutant | CTACTACACTGGTGCAAATTTGCACTAGTGTAAAACCTCTCGAT<br>TACATACACAAAGCAGCCTACTACACTGGTGCAAATTTGCACTA<br>GTGTAAAAC                                                                                                                                                                                                                                                                                                                                                                                                              |
| The ΔA(-4) pre-crRNA mutant | CTACTACACTGGTGCAAATTTGCACTAGTCTAAAACCTCTCGATTA<br>CATACACAAAGCAGCCTACTACACTGGTGCAAATTTGCACTAGT<br>CTAAAAC                                                                                                                                                                                                                                                                                                                                                                                                              |
| The A(-4)U pre-crRNA mutant | CTACTACACTGGTGCAAATTTGCACTAGTCTATAACTCTCTCGATT<br>ACATACACAAAGCAGCCTACTACACTGGTGCAAATTTGCACTAG<br>TCTATAAC                                                                                                                                                                                                                                                                                                                                                                                                             |
| The A(-4)G pre-crRNA mutant | CTACTACACTGGTGCAAATTTGCACTAGTCTAGAACTCTCTCGATT<br>ACATACACAAAGCAGCCTACTACACTGGTGCAAATTTGCACTAG<br>TCTAGAAC                                                                                                                                                                                                                                                                                                                                                                                                             |
| The A(-2)U pre-crRNA mutant | CTACTACACTGGTGCAAATTTGCACTAGTCTAAATCTCTCTCGATT<br>ACATACACAAAGCAGCCTACTACACTGGTGCAAATTTGCACTAG<br>TCTAAATC                                                                                                                                                                                                                                                                                                                                                                                                             |
| The A(-2)G pre-crRNA mutant | CTACTACACTGGTGCAAATTTGCACTAGTCTAAAGCTCTCTCGATT<br>ACATACACAAAGCAGCCTACTACACTGGTGCAAATTTGCACTAG<br>TCTAAAGC                                                                                                                                                                                                                                                                                                                                                                                                             |
| The C(-1)U pre-crRNA mutant | CTACTACACTGGTGCAAATTTGCACTAGTCTAAAATCTCTCTCGATT<br>ACATACACAAAGCAGCCTACTACACTGGTGCAAATTTGCACTAG<br>TCTAAAAT                                                                                                                                                                                                                                                                                                                                                                                                            |
| The C(-1)G pre-crRNA mutant | CTACTACACTGGTGCAAATTTGCACTAGTCTAAAAGTCTCTCGAT<br>TACATACACAAAGCAGCCTACTACACTGGTGCAAATTTGCACTA<br>GTCTAAAAG                                                                                                                                                                                                                                                                                                                                                                                                             |
| The Δstem pre-crRNA mutant  | CTACTACACTGGAATTCTAGTCTAAAACCTCTCGATTACATACA<br>CAAAGCAGCCTACTACACTGGAATTCTAGTCTAAAAC<br>CACTGGTGCAAATTTGCACTAGTCTAAAACCTCTCGATTACATA<br>CACAAAGCA                                                                                                                                                                                                                                                                                                                                                                     |
| crRNA                       | CACTGGTGCAAATTTGCACTAGCTAAAACCTCTCGATTACATAC<br>ACAAAGCA                                                                                                                                                                                                                                                                                                                                                                                                                                                               |
| The ΔU(-8) crRNA mutant     | CACTGGTGCAAATTTGCACTAGCTAAAACCTCTCGATTACATAC<br>ACAAAGCA                                                                                                                                                                                                                                                                                                                                                                                                                                                               |
| The U(-8)A crRNA mutant     | CACTGGTGCAAATTTGCACTAGACTAAAACCTCTCGATTACATA                                                                                                                                                                                                                                                                                                                                                                                                                                                                           |



---

|                              |                                                                      |
|------------------------------|----------------------------------------------------------------------|
| The U(-8)C crRNA mutant      | CACAAAGCA<br>CACTGGTGCAAATTTGCACTAGCCTAAAACCTCGATTACATA<br>CACAAAGCA |
| The ΔC(-7) crRNA mutant      | CACTGGTGCAAATTTGCACTAGTTAAAACCTCGATTACATAC<br>ACAAAGCA               |
| The C(-7)U crRNA mutant      | CACTGGTGCAAATTTGCACTAGTTAAAACCTCGATTACATA<br>CACAAAGCA               |
| The C(-7)G crRNA mutant      | CACTGGTGCAAATTTGCACTAGTGTAAAACCTCGATTACATA<br>CACAAAGCA              |
| The ΔA(-4) crRNA mutant      | CACTGGTGCAAATTTGCACTAGTCTAAAACCTCGATTACATAC<br>ACAAAGCA              |
| The A(-4)U crRNA mutant      | CACTGGTGCAAATTTGCACTAGTCTATAACTCCTCGATTACATAC<br>ACAAAGCA            |
| The A(-4)G crRNA mutant      | CACTGGTGCAAATTTGCACTAGTCTAGAACTCCTCGATTACATA<br>CACAAAGCA            |
| The A(-2)U crRNA mutant      | CACTGGTGCAAATTTGCACTAGTCTAAATCTCCTCGATTACATAC<br>ACAAAGCA            |
| The A(-2)G crRNA mutant      | CACTGGTGCAAATTTGCACTAGTCTAAAAGCTCCTCGATTACATA<br>CACAAAGCA           |
| The C(-1)U crRNA mutant      | CACTGGTGCAAATTTGCACTAGTCTAAAAATCCTCGATTACATA<br>CACAAAGCA            |
| The C(-1)G crRNA mutant      | CACTGGTGCAAATTTGCACTAGTCTAAAAAGCTCCTCGATTACATA<br>CACAAAGCA          |
| The Δstem crRNA mutant       | CACTGGAATTCTAGTCTAAAACCTCGATTACATACACAAAGC<br>A                      |
| Target RNA                   | TATATAGCTTTGTGTATGTAATCGAGGAACAAGCT                                  |
| The mismatched Target RNA-1  | TATATAGCTTTGTGTATGTAATCGAGCTACAAGCT                                  |
| The mismatched Target RNA-2  | TATATAGCTTTGTGTATGTAATCGTCGAACAAGCT                                  |
| The mismatched Target RNA-3  | TATATAGCTTTGTGTATGTAATGCAGGAACAAGCT                                  |
| The mismatched Target RNA-4  | TATATAGCTTTGTGTATGTAACGAGGAACAAGCT                                   |
| The mismatched Target RNA-5  | TATATAGCTTTGTGTATGATATCGAGGAACAAGCT                                  |
| The mismatched Target RNA-6  | TATATAGCTTTGTGTAACCTAATCGAGGAACAAGCT                                 |
| The mismatched Target RNA-7  | TATATAGCTTTGTGATTGTAATCGAGGAACAAGCT                                  |
| The mismatched Target RNA-8  | TATATAGCTTTGACTATGTAATCGAGGAACAAGCT                                  |
| The mismatched Target RNA-9  | TATATAGCTTACTGTATGTAATCGAGGAACAAGCT                                  |
| The mismatched Target RNA-10 | TATATAGCAATGTGTATGTAATCGAGGAACAAGCT                                  |
| The mismatched Target RNA-11 | TATATACGTTTGTGTATGTAATCGAGGAACAAGCT                                  |

---

76

\*The mutational nucleotides are colored in red.

77

78 **Supplementary Table 4 | Primers used for mutagenesis of UrCas13d.**

| <b>Description</b> | <b>Primers used for mutagenesis*</b>      |
|--------------------|-------------------------------------------|
| UrCas13d_K52A_F    | CCGGTTGCAGAAAAAAGCAAGCAGCGTTAAAGCAGCA     |
| UrCas13d_K52A_R    | TGCTGCTTTAACGCTGCTTGTCTTTTTTCTGCAACCGG    |
| UrCas13d_K56A_F    | AAAAAAAAAAGCAGCGTTGCAGCAGCAGGTATGAAAAGC   |
| UrCas13d_K56A_R    | GCTTTTCATACCTGCTGCTGCAACGCTGCTTTTTTTTT    |
| UrCas13d_K61A_F    | GTTAAAGCAGCAGGTATGGCAAGCATTCTGGTTAGCGAA   |
| UrCas13d_K61A_R    | TCGCTAACCCAGAATGCTTGCCATACCTGCTGCTTTAAC   |
| UrCas13d_F75A_F    | AAAATGTATATTACCAGCGCAGGTAAGGTAATAGCGCAG   |
| UrCas13d_F75A_R    | CTGCGCTATTACCTTTACCTGCGCTGGTAATATACATTTT  |
| UrCas13d_H136A_F   | AATACCAGCAATCCGACCGCACGTAGCGGTGAAAGCAGC   |
| UrCas13d_H136A_R   | GCTGCTTTCACCGCTACGTGCGGTGCGATTGCTGGTATT   |
| UrCas13d_R145A_F   | GGTGAAAGCAGCCCGTTGCAGGTGATATGCTGGGTCT     |
| UrCas13d_R145A_R   | AGACCCAGCATATCACCTGCAACCGGGCTGCTTTCACC    |
| UrCas13d_Q171A_F   | TGATGATAATATTCATATTGCACTGATTTATAATATTCTG  |
| UrCas13d_Q171A_R   | CAGAATATTATAAATCAGTGCAATATGAATATTATCATCA  |
| UrCas13d_D178A_F   | CTGATTTATAATATTCTGGCAATTGAAAAAATTCTGGCA   |
| UrCas13d_D178A_R   | TGCCAGAATTTTTCAATTGCCAGAATATTATAAATCAG    |
| UrCas13d_K181A_F   | AATATTCTGGATATTGAAGCAATCTGGCAGTTTATGTTAC  |
| UrCas13d_K181A_R   | GTAACATAAACTGCCAGAATTGCTTCAATATCCAGAATATT |
| UrCas13d_R288A_F   | GCAATTGTTGGTCAGATTGCACAGTGTGTTTTTTCATGAT  |
| UrCas13d_R288A_R   | ATCATGAAAAACACACTGTGCAATCTGACCAACAATTGC   |
| UrCas13d_H293A_F   | ATTCGTCAGTGTGTTTTGTCAGATAAAAAGCGGTGCAAAAC |
| UrCas13d_H293A_R   | GTTTTGCACCGCTTTTATCTGCAAAAACACACTGACGAAT  |
| UrCas13d_K367A_F   | TATGATTTTATTGTTCTGGCAAGCCAGAAAAATCTGGG    |
| UrCas13d_K367A_R   | CCCAGATTTTCTGGCTTCCAGAACAAATAAAATCATA     |
| UrCas13d_K370A_F   | ATTGTTCTGAAAAGCCAGGCAAAATCTGGGTTTTAGCATT  |
| UrCas13d_K370A_R   | TAATGCTAAAAACCAGATTTGCCTGGCTTTTCAGAACAAT  |
| UrCas13d_K402A_F   | GTATGATAGCGTTCGTAGCGCAATGTATAAACTGATGGA   |
| UrCas13d_K402A_R   | TCCATCAGTTTATACATTGCGCTACGAACGCTATCATA    |
| UrCas13d_K405A_F   | GTTTCGTAGCAAAATGTATGCACTGATGGATTTTCTGCTGT |
| UrCas13d_K405A_R   | ACAGCAGAAAAATCCATCAGTGCATACATTTTGGCTACGAA |
| UrCas13d_R431A_F   | GCACTGGTTCGTAACCTGGCATTAGCATGACCGATGAT    |
| UrCas13d_R431A_R   | ATCATCGTTCATGCTAAATGCCAGTTTACGAACCGATGC   |
| UrCas13d_K439A_F   | AGCATGACCGATGATGAAGCAGAAAGGTATTTATGCAGATG |
| UrCas13d_K439A_R   | CATCTGCATAAAATACCTTCTGCTTCATCATCGGTCTGCT  |
| UrCas13d_Y443A_F   | GATGAAAAGAAGGTATTGTCAGCAGATGAAGCAGCAAAA   |
| UrCas13d_Y443A_R   | TTTTGCTGCTTCATCTGCTGCAATACCTTCTTTTTTCATC  |
| UrCas13d_K512A_F   | ACCTATTTTCTGGATGGTGCAGAAATTAATGATCTGCTG   |
| UrCas13d_K512A_R   | CAGCAGATCATAAATTTCTGCACCATCCAGAAAAATAGGT  |
| UrCas13d_N515A_F   | CTGGATGGTAAAAGAAATTGCAGATCTGCTGACCACCTGA  |
| UrCas13d_N515A_R   | TCAGGGTGGTCAGCAGATCTGCAATTTCTTACCACCTCAG  |
| UrCas13d_K524A_F   | CTGACCACCTGATTAGCGCATTGATAATATTAAGAA      |
| UrCas13d_K524A_R   | TTCTTTAATATTATCAAAATGCGCTAATCAGGGTGGTCAG  |
| UrCas13d_K567A_F   | AATGAACGTATTATTGTTGCAAAATATTGCAAGCATGCG   |
| UrCas13d_K567A_R   | CGCATGCTTGCAATATTGCAACAATAAACAGTTTCATT    |
| UrCas13d_R619A_F   | AAAGGTATTCATGGTCTGGCAAATTTTATTACCAATAATG  |
| UrCas13d_R619A_R   | CATTATTGGTAATAAAATTTGCCAGACCATGAATACCTTT  |
| UrCas13d_N620A_F   | GGTATTCATGGTCTGCGTGCATTTATTACCAATAATGTTA  |
| UrCas13d_N620A_R   | TAACATTATTGGTAATAAATGCACGCAGACCATGAATACC  |
| UrCas13d_R631A_F   | AATGTTATTGAAAGCAGCGCATTTGTTTATCTGATTTAAA  |
| UrCas13d_R631A_R   | TTTAATCAGATAAAACAAATGCGCTGCTTCAATAACATT   |
| UrCas13d_K717A_F   | GGTCGTGAAAATGTTGCAGCAGAACGTGCAAAAAGCAGTTA |
| UrCas13d_K717A_R   | TAACGTCTTTTGCACGTTCTGCTGCAACATTTTCACGACC  |
| UrCas13d_K736A_F   | GTTATGTATCTGCTGGTTGCAAACTGGTTAATGTTAAT    |
| UrCas13d_K736A_R   | ATTAACATTAACCAGATTTGCAACCAGCAGATACATAAC   |
| UrCas13d_N737A_F   | ATGTATCTGCTGGTTAAAGCACTGGTTAATGTTAATGCAC  |
| UrCas13d_N737A_R   | GTGCATTAACATTAACCAGTCTTTAACCCAGCAGATACAT  |
| UrCas13d_R744A_F   | CTGGTTAATGTTAATGCAGCATATGTTATTGCAATTCAT   |
| UrCas13d_R744A_R   | ATGAATTGCAATAACATATGCTGCATTAACATTAACCAG   |
| UrCas13d_R802A_F   | GTTTCTGAAAAAATAAAGCACTGCGTAAATGTGTTGAA    |
| UrCas13d_R802A_R   | TTCAACACATTTACGCAGTGTCTTATTTTTTTTTCAGAAAC |

---

|                  |                                             |
|------------------|---------------------------------------------|
| UrCas13d_L803A_F | CTGAAAAAAAAATAAACGTGCACGTAAATGTGTTGAAGTT    |
| UrCas13d_L803A_R | AACTTCAACACATTTACGTGCACGTTATTTTTTTTCAG      |
| UrCas13d_C806A_F | AATAAACGTCTGCGTAAAGCAGTTGAAGTTGATATTAATAATG |
| UrCas13d_C806A_R | CATTATTAATATCAACTTCAACTGCTTTACGCAGACGTTTATT |
| UrCas13d_R823A_F | AGCATGACCCGTAAATATGCAAATTGTATTGCACATCTG     |
| UrCas13d_R823A_R | CAGATGTGCAATACAATTTGCATATTTACGGGTCATGCT     |
| UrCas13d_H828A_F | ATCGTAATTGTATTGCAGCACTGACCGTTGTTTCGTGAAC    |
| UrCas13d_H828A_R | GTTACGGAACAACGGTCAGTGTGCAATACAATTACGAT      |
| UrCas13d_K887A_F | GAAAAATCATGGTTATACCGCAGATTTTGTAAAGCACTGA    |
| UrCas13d_K887A_R | TCAGTGCTTTAACAAAATCTGCGGTATAACCATGATTTTTC   |
| UrCas13d_K891A_F | TATACCAAAGATTTTGTGTCAGCACTGAATAGCCCGTTTG    |
| UrCas13d_K891A_R | CAAACGGGCTATTCAGTGTGCAACAAAATCTTTGGTATA     |
| UrCas13d_R903A_F | GTTTGGTTATAATATTCCGGCATTTAAAAATCTGAGCATT    |
| UrCas13d_R903A_R | AATGCTCAGATTTTTAAATGCCGGAATATTATAACCAAAC    |
| UrCas13d_F904A_F | GGTTATAATATTCCGCGTGCAAAAAATCTGAGCATTGAA     |
| UrCas13d_F904A_R | TTCAATGCTCAGATTTTTTGACGCGGAATATTATAACC      |
| UrCas13d_K905A_F | TATAATATTCCGCGTTTTGCAAAATCTGAGCATTGAACAG    |
| UrCas13d_K905A_R | CTGTTCAATGCTCAGATTTGCAAAACGCGGAATATTATA     |
| UrCas13d_I909A_F | CGTTTTAAAAATCTGAGCGCAGAACAGCTGTTTGATCGT     |
| UrCas13d_I909A_R | ACGATCAAACAGCTGTTCTGCGCTCAGATTTTTAAAAACG    |
| UrCas13d_Q911A_F | TAAAAATCTGAGCATTGAAGCACTGTTTGATCGTAATGAAT   |
| UrCas13d_Q911A_R | ATTCATTACGATCAAACAGTGCTTCAATGCTCAGATTTTTA   |
| UrCas13d_R915A_F | CATTGAACAGCTGTTTGATGCAAATGAATATCTGACCGAA    |
| UrCas13d_R915A_R | TTCGGTCAGATATTCATTTGCATCAAACAGCTGTTCAATG    |

---

79 \*Forward and reverse primers are indicated by “F” and “R”, respectively.

80

81 **Supplementary Table 5 | Primers used for mutagenesis of RNA coding sequences.**

| <b>Description</b>             | <b>Primers used for mutagenesis*</b>         |
|--------------------------------|----------------------------------------------|
| The ΔU(-8) crRNA mutant_F      | GGTGCAAATTTGCACTAGCTAAAACTCCTCGATTACA        |
| The ΔU(-8) crRNA mutant_R      | TGTAATCGAGGAGTTT TAGCTAGTGCAAATTTGCACC       |
| The U(-8)A crRNA mutant_F      | GGTGCAAATTTGCACTAGACTAAAACTCCTCGATTACA       |
| The U(-8)A crRNA mutant_R      | TGTAATCGAGGAGTTT TAGTCTAGTGCAAATTTGCACC      |
| The U(-8)C crRNA mutant_F      | GGTGCAAATTTGCACTAGCCTAAAACTCCTCGATTACA       |
| The U(-8)C crRNA mutant_R      | TGTAATCGAGGAGTTT TAGGCTAGTGCAAATTTGCACC      |
| The ΔC(-7) crRNA mutant_F      | GTGCAAATTTGCACTAGTTAAAACTCCTCGATTACA         |
| The ΔC(-7) crRNA mutant_R      | TGTAATCGAGGAGTTT TAACTAGTGCAAATTTGCAC        |
| The C(-7)U crRNA mutant_F      | GTGCAAATTTGCACTAGTTTAAAACTCCTCGATTACA        |
| The C(-7)U crRNA mutant_R      | TGTAATCGAGGAGTTT TAACTAGTGCAAATTTGCAC        |
| The C(-7)G crRNA mutant_F      | GTGCAAATTTGCACTAGTGTA AAACTCCTCGATTACA       |
| The C(-7)G crRNA mutant_R      | TGTAATCGAGGAGTTT TACACTAGTGCAAATTTGCAC       |
| The ΔA(-4) crRNA mutant_F      | GCAAATTTGCACTAGTCTAAAACTCCTCGATTACATACA      |
| The ΔA(-4) crRNA mutant_R      | TGTATGTAATCGAGGAGTT TAGACTAGTGCAAATTTGC      |
| The A(-4)U crRNA mutant_F      | GCAAATTTGCACTAGTCTATAA CTCTCGATTACATACA      |
| The A(-4)U crRNA mutant_R      | TGTATGTAATCGAGGAGTT TAGACTAGTGCAAATTTGC      |
| The A(-4)G crRNA mutant_F      | GCAAATTTGCACTAGTCTAGAA CTCTCGATTACATACA      |
| The A(-4)G crRNA mutant_R      | TGTATGTAATCGAGGAGTT TAGACTAGTGCAAATTTGC      |
| The A(-2)U crRNA mutant_F      | AATTTGCACTAGTCTAAAATCTCCTCGATTACATACA        |
| The A(-2)U crRNA mutant_R      | GTGTATGTAATCGAGGAGTT TAGACTAGTGCAAATT        |
| The A(-2)G crRNA mutant_F      | AATTTGCACTAGTCTAAAAGCTCCTCGATTACATACAC       |
| The A(-2)G crRNA mutant_R      | GTGTATGTAATCGAGGAGCTT TAGACTAGTGCAAATT       |
| The C(-1)U crRNA mutant_F      | AATTTGCACTAGTCTAAAAATCTCCTCGATTACATACAC      |
| The C(-1)U crRNA mutant_R      | GTGTATGTAATCGAGGAATTT TAGACTAGTGCAAATT       |
| The C(-1)G crRNA mutant_F      | AATTTGCACTAGTCTAAAAAGCTCCTCGATTACATACAC      |
| The C(-1)G crRNA mutant_R      | GTGTATGTAATCGAGGACTTT TAGACTAGTGCAAATT       |
| The mismatched Target RNA-1_F  | AGCTTTGTGTATGTAATCGAGCTACAAGCTTGCGTAATCATG   |
| The mismatched Target RNA-1_R  | CATGATTACGCCAAGCTTGTAGCTCGATTACATACACAAAGCT  |
| The mismatched Target RNA-2_F  | TAGCTTTGTGTATGTAATCGTCGAACAAGCTTGCGTAATC     |
| The mismatched Target RNA-2_R  | GATTACGCCAAGCTTGTTCGACGATTACATACACAAAGCTA    |
| The mismatched Target RNA-3_F  | TATAGCTTTGTGTATGTAATGCAGGAACAAGCTTGCGTAATC   |
| The mismatched Target RNA-3_R  | GATTACGCCAAGCTTGTTCCTGCATTACATACACAAAGCTATA  |
| The mismatched Target RNA-4_F  | GTATATAGCTTTGTGTATGTATACGAGGAACAAGCTTGCGTA   |
| The mismatched Target RNA-4_R  | TACGCCAAGCTTGTTCCTCGTATACATACACAAAGCTATATAC  |
| The mismatched Target RNA-5_F  | GGTATATAGCTTTGTGTATGATATCGAGGAACAAGCTTGCGGT  |
| The mismatched Target RNA-5_R  | ACGCCAAGCTTGTTCCTCGATATACATACACAAAGCTATATACC |
| The mismatched Target RNA-6_F  | TAGGTATATAGCTTTGTGTA ACTAATCGAGGAACAAGCTTGG  |
| The mismatched Target RNA-6_R  | CCAAGCTTGTTCCTCGATTAGTTACACAAAGCTATATACCTA   |
| The mismatched Target RNA-7_F  | TATAGGTATATAGCTTTGTGATTGTAATCGAGGAACAAGCTTG  |
| The mismatched Target RNA-7_R  | CAAGCTTGTTCCTCGATTACAATCACAAGCTATATACCTATA   |
| The mismatched Target RNA-8_F  | ACTATAGGTATATAGCTTTGACTATGTAATCGAGGAACAAGC   |
| The mismatched Target RNA-8_R  | GCTTGTTCCTCGATTACATAGTCAAAGCTATATACCTATAGT   |
| The mismatched Target RNA-9_F  | CACTATAGGTATATAGCTTACTGTATGTAATCGAGGAACAA    |
| The mismatched Target RNA-9_R  | TTGTTCCTCGATTACATACAGTAAGCTATATACCTATAGTG    |
| The mismatched Target RNA-10_F | ACTCACTATAGGTATATAGCAATGTGTATGTAATCGAGGAAC   |
| The mismatched Target RNA-10_R | GTTCCCTCGATTACATACACATTGCTATATACCTATAGTGAGT  |
| The mismatched Target RNA-11_F | CGACTCACTATAGGTATATACGTTTGTGTATGTAATCGAGGA   |
| The mismatched Target RNA-11_R | TCCTCGATTACATACACAAACGTATATACCTATAGTGAGTCG   |

82 \*Forward and reverse primers are indicated by “F” and “R”, respectively.
